# Supplementary material
Source: Springer Nature journal article supplement (https://www.springermedizin.de/resource/supplementary/12903_2009_145_MOESM1_ESM.pdf/9516226)

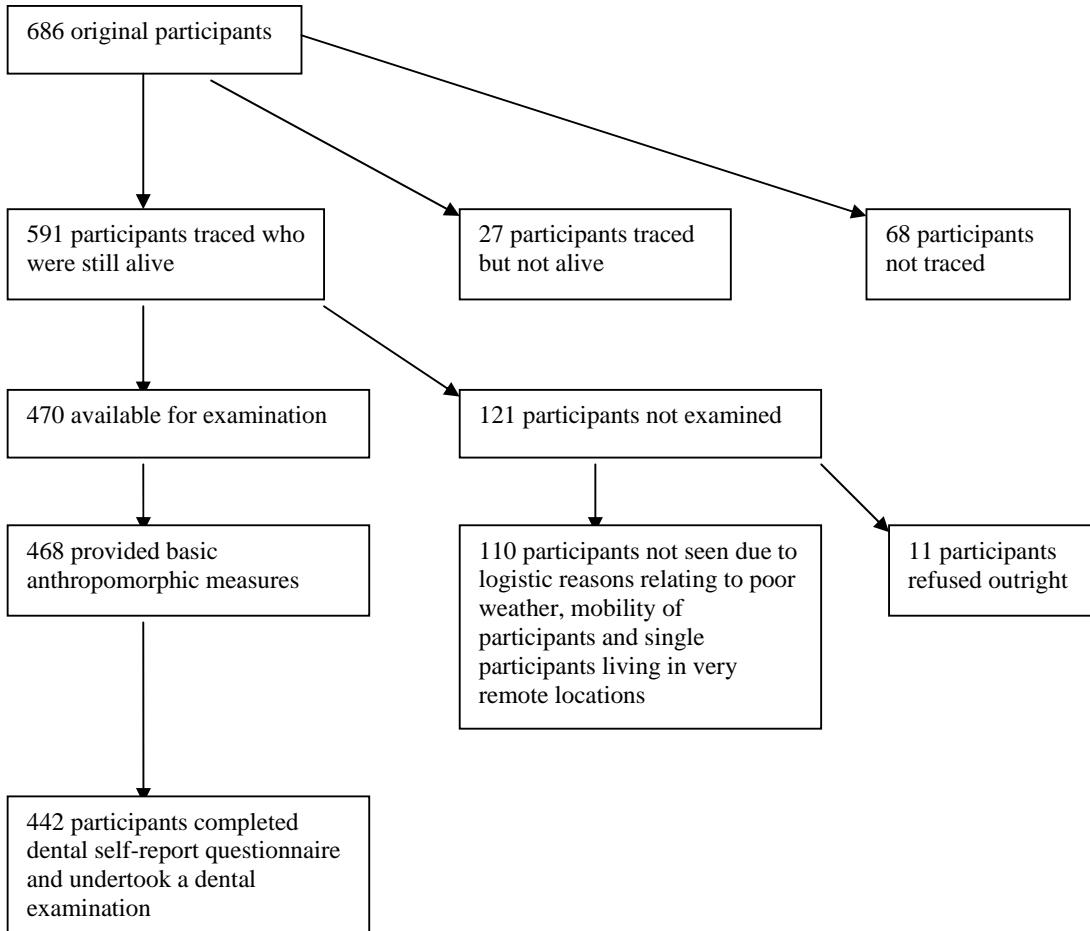

Supplement: MOESM1 [file 9516226]
